# Supplementary material
Source: MDPI journal article supplement (https://www.mdpi.com/2073-4344/13/4/660)
Supplement: s1 [file s1]

**Table S1.** SEM micrographs and images and atomic ratios obtained from EDS mapping of the middle mesh (mesh 15) of the catalytic wire mesh monoliths developed.

|                      | Ce(Ny)-M                                                                           | Ce(S),Ce(Ny)-M                                                                     | Co(S),Ce(Ny)                                                                         | Co(S),Ce(S),<br>Ce(Ny)                                                                |
|----------------------|------------------------------------------------------------------------------------|------------------------------------------------------------------------------------|--------------------------------------------------------------------------------------|---------------------------------------------------------------------------------------|
|                      | 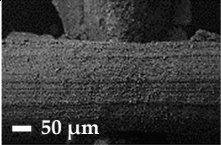  |   |    |    |
| Fe                   |   |   |    |    |
| Cr                   |   |   |    |    |
| Mn                   |   |   |    |    |
| Ce                   |  |  |   |   |
| Co                   |                                                                                    |                                                                                    |  |  |
| $\frac{Co}{Co + Ce}$ |                                                                                    |                                                                                    | 0.13                                                                                 | 0.17                                                                                  |

| Table S2. SEM/EDS mapping images of the central region of the catalytic cordierite monoliths channels and atomic ratios obtained. |                                                                                     |                                                                                     |                                                                                      |                                                                                       |
|-----------------------------------------------------------------------------------------------------------------------------------|-------------------------------------------------------------------------------------|-------------------------------------------------------------------------------------|--------------------------------------------------------------------------------------|---------------------------------------------------------------------------------------|
|                                                                                                                                   | Ce(Ny)                                                                              | Ce(S),Ce(Ny)                                                                        | Co(S),Ce(Ny)                                                                         | Co(S),Ce(S),Ce(Ny)                                                                    |
|                                                                                                                                   | 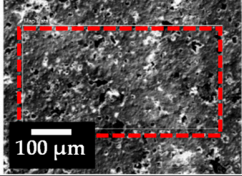   |    |    |    |
| Al                                                                                                                                |    |    |    |    |
| Mg                                                                                                                                |    |    |    |    |
| Si                                                                                                                                |   |   |   |   |
| Ce                                                                                                                                |  |  |  |  |
| Co                                                                                                                                |                                                                                     |                                                                                     |  |  |
| $\frac{Co}{Co + Ce}$                                                                                                              |                                                                                     |                                                                                     | 0.35                                                                                 | 0.03                                                                                  |
